# Supplementary material for: Evaluation of Pupils’ Knowledge about Kidney Health
Source: MDPI journal article supplement (doi:10.3390/ijerph182312811), 2021-12-04
Supplement: s1 [file s1]

**Table S1.** Association between gender and grade with water consumption and frequency of urination.

|                                                                                       | <b>Boys</b>  | <b>Girls</b> |                | <b>5<sup>th</sup> Grade</b> | <b>6<sup>th</sup> Grade</b> |                |
|---------------------------------------------------------------------------------------|--------------|--------------|----------------|-----------------------------|-----------------------------|----------------|
|                                                                                       | <b>N (%)</b> | <b>N (%)</b> | <b>p-Value</b> |                             |                             | <b>p-Value</b> |
| <b>Water Consumption</b>                                                              |              |              | 0.103          |                             |                             | 0.222          |
| Less than 2 glasses per day                                                           | 0 (0.0%)     | 4 (3.4%)     |                | 2 (1.9%)                    | 2 (1.7%)                    |                |
| 2–4 glasses per day                                                                   | 29 (27.9%)   | 25 (21.6%)   |                | 20 (19.2%)                  | 34 (29.3%)                  |                |
| More than 4 glasses per day                                                           | 75 (72.1%)   | 87 (75.0%)   |                | 82 (78.8%)                  | 80 (69.0%)                  |                |
| <b>Q13. How many times a day do you have to go to the toilet?</b>                     |              |              |                |                             |                             |                |
| <b>Frequency of urination</b>                                                         |              |              | 0.009          |                             |                             | 0.484          |
| 2–4 times per day                                                                     | 71 (68.3%)   | 59 (50.9%)   |                | 64 (61.5%)                  | 66 (56.9%)                  |                |
| More than 4 times per day                                                             | 33 (31.7%)   | 57 (49.1%)   |                | 40 (38.5%)                  | 50 (43.1%)                  |                |
| <b>Q15. Would you like to be informed about kidney function by your school nurse?</b> |              |              |                |                             |                             |                |
| <b>Would you like to be informed about kidney function by your school nurse?</b>      |              |              | 0.049          |                             |                             |                |
| Yes                                                                                   | 96 (92.3%)   | 114 (98.3%)  |                |                             |                             |                |
| No                                                                                    | 8 (7.7%)     | 2 (1.7%)     |                |                             |                             |                |

**Table S2.** Association between gender and pupils' knowledge.

| Question                                                        |                        | Boys<br>N (%) | Girls<br>N (%) | p-Value |
|-----------------------------------------------------------------|------------------------|---------------|----------------|---------|
| 1. How many kidneys does the human body have?                   | Correct                | 92 (93.9%)    | 108 (96.4%)    | 0.386   |
|                                                                 | Incorrect/<br>Not Sure | 6 (6.1%)      | 4 (3.6%)       |         |
| 2. What is the main function of the kidneys in the human body?  | Correct                | 40 (39.2%)    | 38 (33.9%)     | 0.422   |
|                                                                 | Incorrect/<br>Not Sure | 62 (60.8%)    | 74 (66.1%)     |         |
| 3. Where are the kidneys in the human body?                     | Correct                | 34 (32.7%)    | 34 (29.3%)     | 0.588   |
|                                                                 | Incorrect/<br>Not Sure | 70 (67.3%)    | 82 (70.7%)     |         |
| 4. What is the shape of the kidneys like?                       | Correct                | 40 (40.0%)    | 58 (51.8%)     | 0.086   |
|                                                                 | Incorrect/<br>Not Sure | 60 (60.0%)    | 54 (48.2%)     |         |
| 5. Is urine produced in the kidneys?                            | Correct                | 60 (57.7%)    | 66 (58.9%)     | 0.854   |
|                                                                 | Incorrect/<br>Not Sure | 44 (42.3%)    | 46 (41.1%)     |         |
| 6. Do you believe that kidney function can be controlled?       | Correct                | 86 (82.7%)    | 94 (81.0%)     | 0.750   |
|                                                                 | Incorrect/<br>Not Sure | 18 (17.3%)    | 22 (19.0%)     |         |
| 8. Can a child have a kidney problem?                           | Correct                | 90 (86.5%)    | 98 (84.5%)     | 0.666   |
|                                                                 | Incorrect/<br>Not Sure | 14 (13.5%)    | 18 (15.5%)     |         |
| 9. Can a person live with just one kidney?                      | Correct                | 68 (65.4%)    | 80 (71.4%)     | 0.339   |
|                                                                 | Incorrect/<br>Not Sure | 36 (34.6%)    | 32 (28.6%)     |         |
| 11. What will happen to your body if your kidneys stop working? | Correct                | 50 (71.4%)    | 62 (79.5%)     | 0.254   |
|                                                                 | Incorrect/<br>Not Sure | 20 (28.6%)    | 16 (20.5%)     |         |
|                                                                 |                        | Median (IQR)  | Median (IQR)   |         |
| Knowledge score                                                 |                        | 6 (5–7)       | 6 (5–8)        | 0.135   |

Table S3. Association between grade and pupils' knowledge.

| Question                                                                      |                        | 5 <sup>th</sup> Grade<br>N (%) | 6 <sup>th</sup> Grade<br>N (%) | p-Value |
|-------------------------------------------------------------------------------|------------------------|--------------------------------|--------------------------------|---------|
| 1. How many kidneys does the human body have?                                 | Correct                | 94 (94.0%)                     | 106 (96.4%)                    | 0.422   |
|                                                                               | Incorrect/<br>Not Sure | 6 (6.0%)                       | 4 (3.6%)                       |         |
| 2. What is the main function of the kidneys in the human body?                | Correct                | 44 (43.1%)                     | 34 (30.4%)                     | 0.052   |
|                                                                               | Incorrect/<br>Not Sure | 58 (56.9%)                     | 78 (69.6%)                     |         |
| 3. Where are the kidneys in the human body?                                   | Correct                | 24 (23.1%)                     | 44 (37.9%)                     | 0.017   |
|                                                                               | Incorrect/<br>Not Sure | 80 (76.9%)                     | 72 (62.1%)                     |         |
| 4. What is the shape of the kidneys like?                                     | Correct                | 40 (40.8%)                     | 58 (50.9%)                     | 0.143   |
|                                                                               | Incorrect/<br>Not Sure | 58 (59.2%)                     | 56 (49.1%)                     |         |
| 5. Is urine produced in the kidneys?                                          | Correct                | 72 (69.2%)                     | 54 (48.2%)                     | 0.002   |
|                                                                               | Incorrect/<br>Not Sure | 32 (30.8%)                     | 58 (51.8%)                     |         |
| 6. Do you believe that kidney function can be controlled?                     | Correct                | 82 (78.8%)                     | 98 (84.5%)                     | 0.279   |
|                                                                               | Incorrect/<br>Not Sure | 22 (21.2%)                     | 18 (15.5%)                     |         |
| 8. Can a child have a kidney problem?                                         | Correct                | 90 (86.5%)                     | 98 (84.5%)                     | 0.666   |
|                                                                               | Incorrect/<br>Not Sure | 14 (13.5%)                     | 18 (15.5%)                     |         |
| 9. Can a person live with just one kidney?                                    | Correct                | 46 (45.1%)                     | 102 (89.5%)                    | 0.001   |
|                                                                               | Incorrect/<br>Not Sure | 56 (54.9%)                     | 12 (10.5%)                     |         |
| 11. What will happen to your body if your kidneys stop working?               | Correct                | 56 (77.8%)                     | 56 (73.7%)                     | 0.562   |
|                                                                               | Incorrect/<br>Not Sure | 16 (22.2%)                     | 20 (26.3%)                     |         |
| 15. Would you like to be informed about kidney function by your school nurse? | Correct                | 96 (92,3%)                     | 114 (98,3%)                    | 0,049   |
|                                                                               | Incorrect/<br>Not Sure | 8 (7,7%)                       | 2 (1,7%)                       |         |
| 16. Have you seen a poster or watched a TV spot about the                     | Correct                | 2 (1,9%)                       | 14 (12,1%)                     | 0,004   |

| <b>urinary system (kidneys)<br/>recently?</b> | Incorrect/<br>Not Sure | 102 (98,1%)  | 102 (87,9%)  |       |
|-----------------------------------------------|------------------------|--------------|--------------|-------|
|                                               |                        | Median (IQR) | Median (IQR) |       |
| Knowledge score                               |                        | 6 (5–6)      | 6 (5–8)      | 0.035 |
